# Supplementary material for: Evaluation of the practicability and virological performance of finger-stick whole-blood HIV self-testing in French-speaking sub-Saharan Africa
Source: PubMed Central journal article supplement (PMC5761859; doi:10.1371/journal.pone.0189475), 2018-01-10
Supplement: pone.0189475.s005.pdf [file pone.0189475.s005.pdf]

*Ref. Evaluation of the practicability and virological performances of finger-stick whole blood HIV self-test in French-speaking sub-Saharan Africa*

Dear Dr Tonen,

Following your request, I confirm that Biosynex gives permission for the open-access journal PLOS ONE to publish Figure 1 in Swahili featuring Biosynex copyright under the Creative Commons Attribution License (CCAL) CC BY 4.0 (<http://creativecommons.org/licenses/by/4.0/>). Please be aware that this license allows unrestricted use and distribution, even commercially, by third parties.

We remain at your disposal for any further information.

Best regards

Made in Strasbourg, on June 30<sup>th</sup>, 2017



Thierry Paper  
Deputy General Manager

**BIOSYNEX S.A.**  
12 rue Ettore Bugatti - CS28006  
67038 Strasbourg Cedex FRANCE  
Tél : +33 3 88 77 57 00 - Fax : +33 3 59 81 21 74  
Siret : 481 075 703 00019 - N° CEE : FR11481075703
